# Supplementary material for: A High-Fat/High-Protein, Atkins-Type Diet Exacerbates Clostridioides (Clostridium) difficile Infection in Mice, whereas a High-Carbohydrate Diet Protects
Source: PubMed Central journal article supplement (PMC7018531; doi:10.1128/msystems.00765-19), 2020-02-11
Supplement: mSystems.00765-19-st001.pdf [file mSystems.00765-19-st001.pdf]

**Table S1: Experimental setup for testing effect of diet on CDI mouse model.**

| Diet                                        | Purpose      | Antibiotic Cocktail | Clindamycin | <i>C. difficile</i> | % Kcal Fat | % Kcal Protein | % Kcal Carbohydrate |
|---------------------------------------------|--------------|---------------------|-------------|---------------------|------------|----------------|---------------------|
| Standard lab diet +CDI <sup>1</sup>         | - Control    | +                   | +           | +                   | 13.4       | 29.8           | 56.7                |
| Standard (-CDI) <sup>1</sup>                | + Control    | -                   | -           | -                   | 13.4       | 29.8           | 56.7                |
| High-fat/high-protein diet <sup>2</sup>     | Experimental | +                   | +           | +                   | 54         | 40             | 6                   |
| Low-fat/high-carbohydrate diet <sup>3</sup> | Experimental | +                   | +           | +                   | 11.9       | 15.9           | 72.2                |
| High-fat/low-protein diet <sup>4</sup>      | Experimental | +                   | +           | +                   | 59.3       | 14.9           | 25.8                |

**References/Description**

1: LabDiet 5001

2: Custom purified diet containing approximately 50% protein and 25% fat (TestDiet Catalog # 1818123-286; Freudenberg et al. 2012)

3: Modified from AIN-93G Low Fat Control Diet for the Western Diet- TestDiet 5TJN (TestDiet Catalog # 1818122-203)

4: AIN-76A Semi-Purified Diet 5800-B Surwit Diet with 58% Fat Energy/Sucrose (TestDiet Catalog # 1818121-286)
